# Supplementary material for: A–D–A-type S,N-heteropentacene-based hole transport materials for dopant-free perovskite solar cells
Source: Royal Society of Chemistry journal article supplement (doi:10.1039/c5ta03865k), 2015-01-01
Supplement: c5ta03865k1.pdf [file c5ta03865k1.pdf]

## Supporting Information

### **A-D-A-type S,N-Heteropentacene-based Hole Transport Materials for Dopant-free Perovskite Solar Cells**

Christopher Steck,<sup>a†</sup> Marius Franckevičius,<sup>bc†</sup> Shaik Mohammed Zakeeruddin,<sup>b\*</sup> Amaresh  
Mishra,<sup>a\*</sup> Peter Bäuerle,<sup>a</sup> Michael Grätzel<sup>b\*</sup>

<sup>a</sup>*Institute of Organic Chemistry II and Advanced Materials, University of Ulm, Albert-Einstein-Allee 11, 89081  
Ulm, Germany. Email amaresh.mishra@uni-ulm.de*

<sup>b</sup>*Laboratory of Photonics and Interfaces, Institute of Chemical Sciences and Engineering, School of Basic  
Sciences, Ecole Polytechnique Fédérale de Lausanne (EPFL), CH-1015 Lausanne, Switzerland.*

<sup>c</sup>*Center for Physical Sciences and Technology, Savanorių Ave. 231, LT-02300 Vilnius, Lithuania.*

<sup>†</sup>These authors contributed equally to this work.

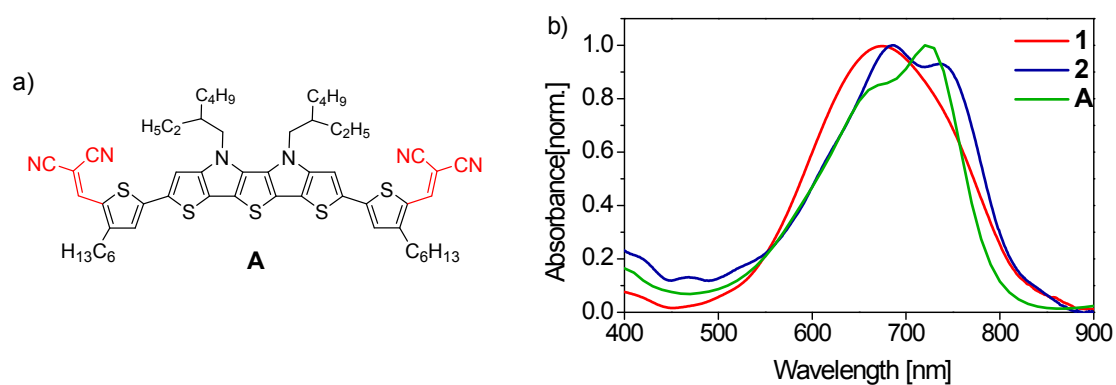

**Figure S1.** a) Chemical structure oligomer **A** and b) UV-Vis absorption spectra of HTMs **1** and **2** on TiO<sub>2</sub> film compared with oligomer **A** reported in *reference 1*.

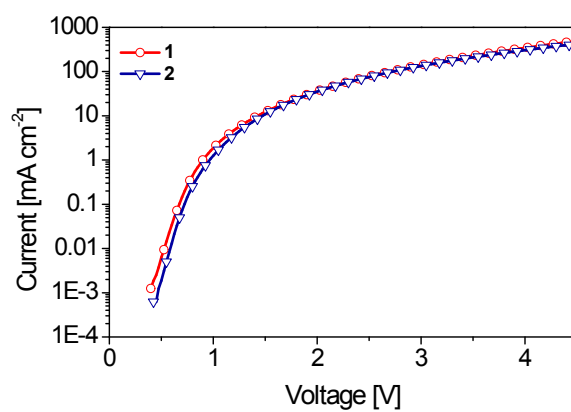

**Figure S2.** *J-V* plots of the hole-only devices for oligomers **1** and **2**.

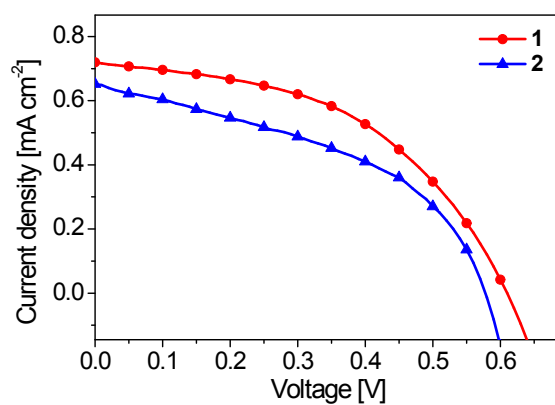

**Figure S3.** The *J-V* characteristics of the heterojunction solar cells based on the device configuration of TiO<sub>2</sub>/HTM **1** or **2**/Au.

**Table S1.** Photovoltaic parameters of CH<sub>3</sub>NH<sub>3</sub>PbI<sub>3</sub>-based solar cells with HTMs **1** and **2** using different concentration and spin speed.

| HTM      | Conc. [M]/<br>Spin speed [rpm] | $J_{sc}$ [mA cm <sup>-2</sup> ] | $V_{oc}$ [mV] | FF          | PCE [%]     |
|----------|--------------------------------|---------------------------------|---------------|-------------|-------------|
| <b>1</b> | 0.04/4000                      | 16.6                            | 950           | 0.68        | 10.7        |
| <b>1</b> | 0.04/2000                      | 16.7                            | 948           | 0.66        | 10.4        |
| <b>1</b> | <b>0.03/2000</b>               | <b>16.6</b>                     | <b>953</b>    | <b>0.72</b> | <b>11.4</b> |
| <b>1</b> | 0.03/2000                      | 16.5                            | 955           | 0.71        | 11.2        |
| <b>1</b> | 0.03/2000                      | 16.5                            | 956           | 0.72        | 11.3        |
| <b>1</b> | 0.03/2000                      | 16.6                            | 951           | 0.72        | 11.4        |
| <b>1</b> | 0.03/4000                      | 16.3                            | 942           | 0.71        | 10.9        |
| <b>1</b> | 0.02/2000                      | 16.0                            | 938           | 0.70        | 10.5        |
| <b>1</b> | 0.02/4000                      | 15.8                            | 923           | 0.69        | 10.1        |
| <b>2</b> | 0.04/4000                      | 15.9                            | 899           | 0.67        | 9.6         |
| <b>2</b> | 0.04/2000                      | 16.2                            | 884           | 0.66        | 9.5         |
| <b>2</b> | <b>0.03/2000</b>               | <b>16.3</b>                     | <b>899</b>    | <b>0.70</b> | <b>10.3</b> |
| <b>2</b> | 0.03/2000                      | 16.2                            | 896           | 0.70        | 10.1        |
| <b>2</b> | 0.03/2000                      | 16.2                            | 886           | 0.70        | 10.0        |
| <b>2</b> | 0.03/2000                      | 15.9                            | 904           | 0.71        | 10.2        |
| <b>2</b> | 0.03/4000                      | 14.6                            | 913           | 0.72        | 9.6         |
| <b>2</b> | 0.02/2000                      | 13.8                            | 907           | 0.67        | 8.4         |
| <b>2</b> | 0.02/4000                      | 13.3                            | 891           | 0.70        | 8.3         |

**Table S2.** Photovoltaic parameters of solar cells with configuration of TiO<sub>2</sub>/HTM **1** or **2**/Au without the perovskite layer.

| HTM      | $J_{sc}$ [mA cm <sup>-2</sup> ] | $V_{oc}$ [mV] | FF   | PCE [%] |
|----------|---------------------------------|---------------|------|---------|
| <b>1</b> | 0.72                            | 0.64          | 0.48 | 0.22    |
| <b>2</b> | 0.65                            | 0.60          | 0.44 | 0.17    |

## Reference

1. P. Qin, H. Kast, M. K. Nazeeruddin, S. M. Zakeeruddin, A. Mishra, P. Bauerle and M. Gratzel, *Energy Environ. Sci.*, 2014, **7**, 2981-2985.
